# Supplementary material for: Host–Guest Interaction Study of Olmesartan Medoxomil with β-Cyclodextrin Derivatives
Source: MDPI journal article supplement (doi:10.3390/molecules29102209), 2024-05-08
Supplement: s1 [file s1]

# Host–Guest Interaction Study of Olmesartan Medoxomil with $\beta$ -Cyclodextrin Derivatives

Minodora Andor <sup>1</sup>, Claudia Temereancă <sup>2</sup>, Laura Sbârcea <sup>3,4</sup>, Adriana Ledeti <sup>3,4,\*</sup>, Dana Emilia Man <sup>1</sup>, Cristian Mornoș <sup>1</sup>, Amalia Ridichie <sup>3,4</sup>, Denisa Cîrcioban <sup>3,4</sup>, Gabriela Vlase <sup>5</sup>, Paul Barvinschi <sup>6</sup>, Angela Caunii <sup>3,4</sup>, Renata-Maria Văruț <sup>7</sup>, Cristina Maria Trandafirescu <sup>3</sup>, Valentina Buda <sup>3</sup>, Ionuț Ledeti <sup>2,3,4</sup> and Matilda Rădulescu <sup>1</sup>

- <sup>1</sup> Faculty of Medicine, “Victor Babeș” University of Medicine and Pharmacy, 2 Eftimie Murgu Square, 300041 Timisoara, Romania; andor.minodora@umft.ro (M.A.); man.dana@umft.ro (D.E.M.); cmornos@cardiologie.ro (C.M.); radulescu.matilda@umft.ro (M.R.)
- <sup>2</sup> Faculty of Industrial Chemistry and Environmental Engineering, University Politehnica Timisoara, 2 Victoriei Square, 300006 Timisoara, Romania; claudia.temereanca@student.upt.ro (C.T.); ionut.ledeti@umft.ro (I.L.)
- <sup>3</sup> Faculty of Pharmacy, “Victor Babeș” University of Medicine and Pharmacy, 2 Eftimie Murgu Square, 300041 Timisoara, Romania; sbarcea.laura@umft.ro (L.S.); amalia.ridichie@umft.ro (A.R.); circioban.denisa@umft.ro (D.C.); caunii.angelica@umft.ro (A.C.); trandafirescu.cristina@umft.ro (C.M.T.); buda.valentina@umft.ro (V.B.)
- <sup>4</sup> Advanced Instrumental Screening Center, Faculty of Pharmacy, “Victor Babeș” University of Medicine and Pharmacy Timisoara, 2 Eftimie Murgu Square, 300041 Timisoara, Romania
- <sup>5</sup> Research Centre for Thermal Analysis in Environmental Problems, West University of Timisoara, Pestalozzi Street 16, 300115 Timisoara, Romania; gabriela.vlase@e-uvt.ro
- <sup>6</sup> Faculty of Physics, West University of Timisoara, 4 Vasile Parvan Blvd, 300223 Timisoara, Romania; pc\_barvi@yahoo.fr
- <sup>7</sup> Faculty of Pharmacy, University of Medicine and Pharmacy Craiova, 2–4 Petru Rares Str., 200349 Craiova, Romania; renata\_maria@yahoo.com
- \* Correspondence: afulias@umft.ro

## Supplementary Materials

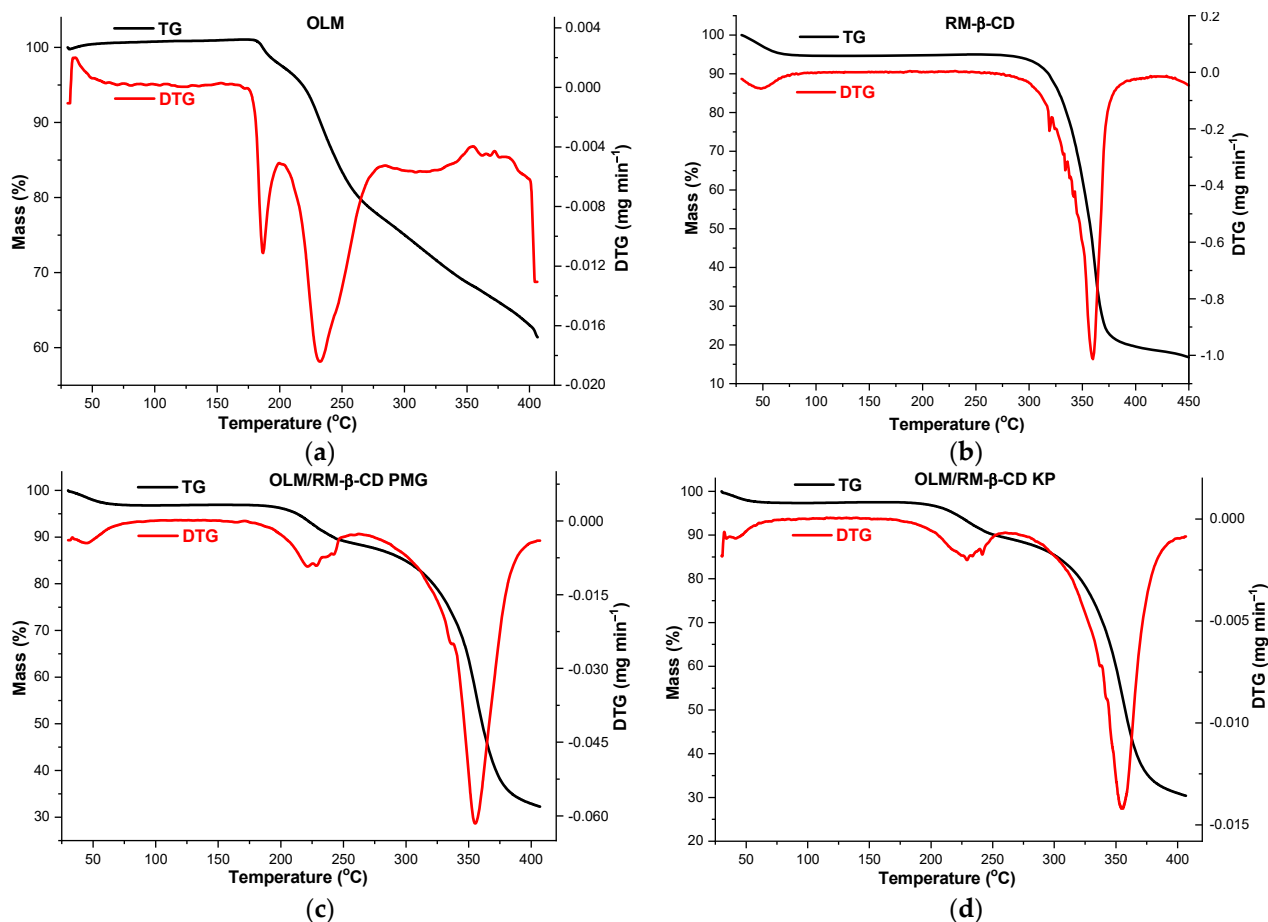

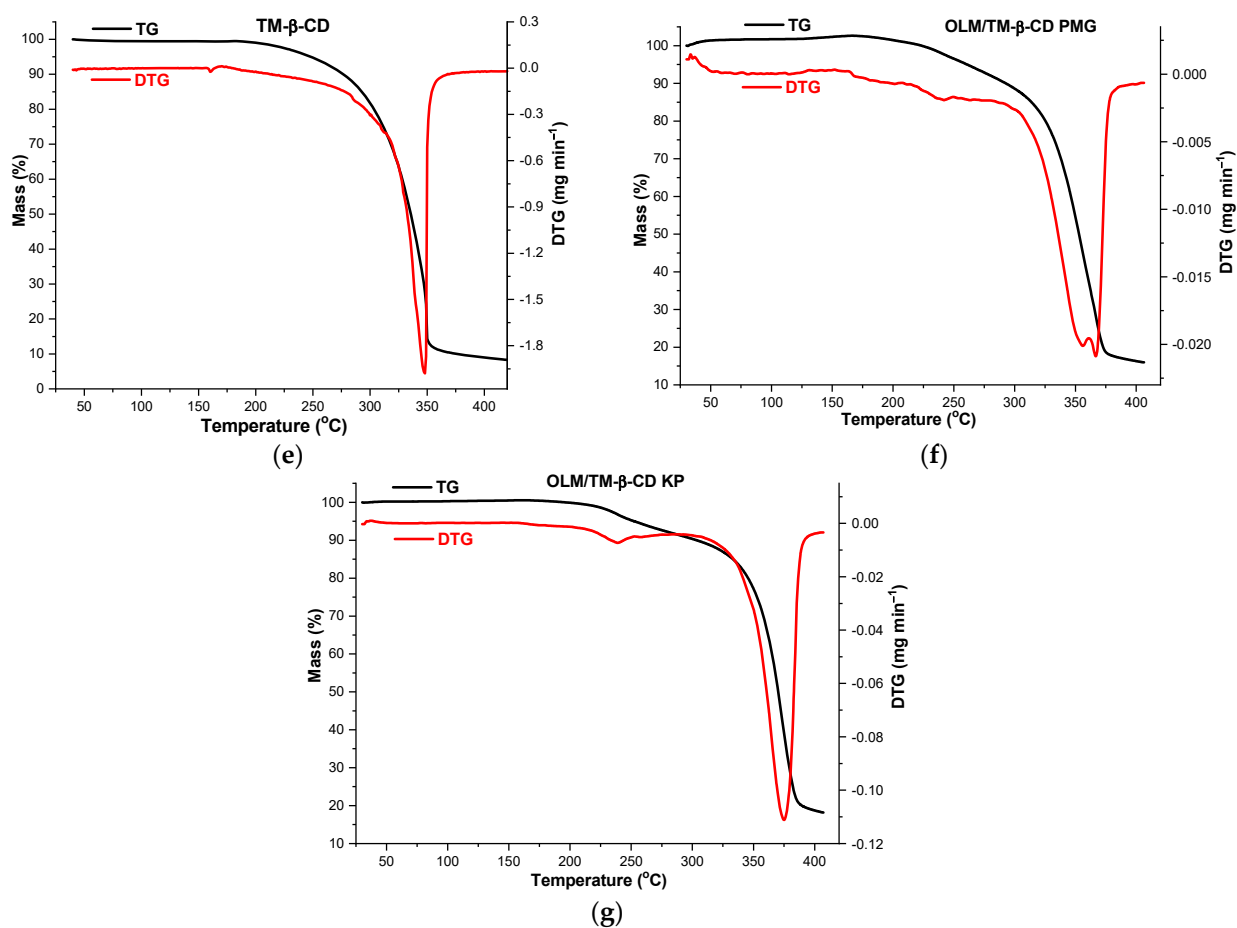

**Figure S1.** TG/DTG thermal curves of OLM (a); RM-β-CD (b); OLM/RM-β-CD PMG (c); OLM/RM-β-CD KP (d); TM-β-CD (e); OLM/TM-β-CD PMG (f) and OLM/TM-β-CD KP (g) in air atmosphere.
